# Supplementary material for: An attempt to provide an environmentally friendly solvent selection guide for olefin metathesis
Source: Royal Society of Chemistry journal article supplement (doi:10.1039/c3gc41943f), 2013-11-06
Supplement: c3gc41943f.pdf [file c3gc41943f.pdf]

## SUPPORTING INFORMATION

### **In an attempt to provide an environmentally friendly solvent selection guide for olefin metathesis**

Krzysztof Skowerski,<sup>a,\*</sup> Jacek Białecki,<sup>a</sup> Andrzej Tracz<sup>a</sup> and Tomasz K. Olszewski<sup>b,\*</sup>

<sup>a</sup>Apeiron Catalysts Sp. z o.o., ul. Duńska 9, 54-427 Wrocław, Poland. Fax: +48-71-7985-622; Tel: +48-71-7985-621; E-mail: krzysztof.skowerski@apeiron-catalysts.com

<sup>b</sup> Wrocław University of Technology, Faculty of Chemistry, Department of Organic Chemistry, Wybrzeże St. Wyspiańskiego 27, 50-370 Wrocław, Poland. Fax: (+48)-71-320-2427; Tel.: (+48)-320-3210 E-mail: tomasz.olszewski@pwr.wroc.pl

#### **Table of contents:**

|                                                    |      |
|----------------------------------------------------|------|
| General information.....                           | S 2  |
| Protocols for conducting metathesis reactions..... | S 2  |
| Characterisation of all metathesis products.....   | S 3  |
| Copies of the NMR spectra.....                     | S 4  |
| References.....                                    | S 11 |

## General information

NMR spectra were recorded on Bruker Avance 300 MHz spectrometer in CDCl<sub>3</sub>; chemical shifts ( $\delta$ ) are given in parts per million (ppm) downfield from trimethylsilane as referenced to residual protio solvent peaks, coupling constants ( $J$ ) are reported in hertz (Hz). GC analysis: Trace GC Ultra, Thermo Electron Corporation, HP-5 column. MS (ESI): LCT PremierXE Waters mass spectrometer. IR spectra were recorded on a PerkinElmer 1600 FTIR spectrometer.

Catalysts **G-II** (CAS 246047-72-3), **G-II'** (CAS 373640-75-6), **H-II** (CAS 301224-40-8), **H-II'** (CAS 635679-24-2), **N-II** (CAS 502964-52-5), **Ind-II** (CAS 340810-50-6), **Ind-II'** (CAS 1307233-23-3) are commercially available. Catalysts **N-II'**<sup>1</sup> and **E-II'**<sup>2</sup> were obtained according to literature procedures.

### Synthesis of catalyst E-II'

(*E*)-methyl 2-(2-(prop-1-en-1-yl)phenoxy)propanoate (0.389 g, 1.77 mmol) and CuCl (0.238 g, 2.41 mmol) were added to the solution of **G-II'** (1.5 g, 1.6 mmol) in dry, degassed DCM. Reaction mixture was stirred at 30 °C for 30 min. DCM was concentrated and the residue was purified by column chromatography (elu *c*-hex/AcOEt 9/1). After removal of solvents product was obtained as a green solid, 1.0 g, 82 % of yield.

## Protocols for conducting metathesis reactions

### General procedure for RCM of small rings and enyne reaction.

Solution of substrate in appropriate ACS grade solvent (5 ml, 0.1 M) was heated to the desired temperature for 5 minutes prior to addition of stock solution of catalyst in DCM (50  $\mu$ L, 0.25 or 0.5 mol%). Reaction mixture was stirred for 1 h without protective atmosphere of inert gas. After that time 100  $\mu$ L of reaction mixture was quenched with excess of ethyl vinyl ether, diluted with 100  $\mu$ L of pure solvent and analysed by GC-FID.

### General procedure for RCM reaction in EtOAc with the use of dienes 7 and 9.

Solution of substrate and dodecane in ACS grade AcOEt (0.005 M, 40 mL) was heated to 70 °C for 5 minutes prior to addition of catalyst. Syringe was filled with the solution of **NII'** (0.5 mol%) in AcOEt (4 ml) and placed in syringe pump. Solution of catalyst was added over 1 h to the solution of substrate maintained at 70 °C with the flow rate of 4 ml/h. To establish the initial ratio between the substrate and dodecane at  $t_0$  (0% conversion) 400  $\mu$ L of 0.005 M solution was diluted with 40  $\mu$ L of AcOEt and analyzed by GC-FID. After 90 minutes 400  $\mu$ L of reaction mixture was quenched by addition of 4  $\mu$ L of ethyl vinyl ether and analysed by GC-FID at this concentration.

### General procedure for CM.

Solution of substrate and dodecane (5 ml, 0.1 M) and **14** (4 eq) in appropriate solvent was heated to 70 °C for 5 minutes prior to addition of stock solution of catalyst in DCM (50  $\mu$ L, 0.5 mol%). Reaction mixture was stirred for 1 h without protective atmosphere of inert gas. After that time 400  $\mu$ L of reaction mixture was quenched with 12  $\mu$ L of ethyl vinyl ether, diluted with 400  $\mu$ L of pure solvent and analysed by GC-FID. To establish the initial ratio between the substrate and dodecane at  $t_0$  (0% conversion) 400  $\mu$ L of 0.1 M solution was diluted with 412  $\mu$ L of AcOEt and analyzed by GC-FID.

CM experiments with slow addition of catalysts were carried out by analogy to the macrocyclization. After first 30 min of reaction additional 2 eq of **14** was added in each case (Table 5, Entry 1,2) while **18** was added only at the beginning of the reaction (3 eq).

## Characterisation of the metathesis products

### Catalyst **E-II'**

<sup>1</sup>H NMR (300 MHz, CDCl<sub>3</sub>) δ ppm: 16.46 (s, 1H), 7.55-7.50 (m, 7H), 6.89-6.88 (m, 2H), 6.65 (d, 1H *J* = 8.26 Hz), 5.02 (q, 1H, *J* = 6.7 Hz), 4.19 (s, 4H), 3.64-3.58 (m, 7H), 1.64 (d, 3H *J* = 6.83 Hz), 1.28-1.25 (m, 24 H). <sup>13</sup>C NMR (75.4 MHz, CDCl<sub>3</sub>) δ ppm: 292.31, 213.07, 170.67, 151.80, 149.26, 149.12, 144.40, 129.49, 128.85, 124.40, 123.45, 122.49, 112.48, 54.62, 52.89, 28.79, 26.58, 23.57, 23.52, 18.01. IR, ν<sub>max</sub> (KBr): 3447, 3025, 2966, 2926, 2867, 1941, 1736, 1627, 1575, 1592, 1475, 1453, 1406, 1390, 1345, 1326, 1295, 1262, 1234, 1158, 1116, 1050, 978, 932, 901, 863, 804, 754, 742, 698, 646, 620, 554, 459, 441.

### *N*-Tosyl-2,5-dihydropyrrole (**2**).<sup>3</sup>

<sup>1</sup>H NMR (300 MHz, CDCl<sub>3</sub>) δ ppm: 7.74-7.68 (m, 2H), 7.33-7.29 (m, 2H), 5.66-5.62 (m, 2H), 4.12-4.08 (m, 4H), 2.41 (s, 3H).

### *1*-Tosyl-2,3-dihydro-1H-pyrrole (**2'**).<sup>4</sup>

<sup>1</sup>H-NMR (300 MHz, CDCl<sub>3</sub>) δ ppm: 7.68-7.65 (m, 2H), 7.33-7.30 (m, 2H), 6.38 (br s, 1H), 5.13 (br s, 1H), 3.47 (t, *J* = 8.7 Hz, 2H), 2.51-2.43 (m, 5H).

### *3*-Methyl-4-methylene-1-[(4-methylphenyl)sulfonyl]pyrrolidin (**2''**).<sup>5</sup>

<sup>1</sup>H-NMR (300 MHz, CDCl<sub>3</sub>) δ ppm: 7.71 (d, *J* = 8.2 Hz, 2H), 7.34 (d, *J* = 8.0 Hz, 2H), 4.91 (d, *J* = 2.0 Hz, 1H), 4.85 (d, *J* = 2.2 Hz, 1H), 3.96 (d, *J* = 14.0 Hz, 1H), 3.73 (d, *J* = 15.8 Hz, 1H), 3.60-3.58 (m, 1H), 2.72-2.67 (m, 2H), 2.45 (s, 3H), 1.05 (d, *J* = 6.4 Hz, 3H).

### *N*-Tosyl-3-methyl-2,5-dihydropyrrole (**4**).<sup>6</sup>

<sup>1</sup>H NMR (300 MHz, CDCl<sub>3</sub>) δ ppm: 7.71-7.69 (m, 2H), 7.32-7.29 (m, 2H), 5.24-5.22 (m, 1H), 4.07-4.03 (m, 2H), 3.97-3.95 (m, 2H), 2.41 (s, 3H), 1.64 (s, 3H).

### 2,2-Diphenyl-3-vinyl-2,5-dihydrofuran (**12**).<sup>7</sup>

Colourless oil. <sup>1</sup>H NMR (300 MHz, CDCl<sub>3</sub>) δ ppm: 7.37-7.28 (m, 10H), 6.28-6.20 (m, 2H), 5.32 (d, *J* = 14.1, 1H), 5.11 (d, *J* = 8.4, 1H), 4.80-4.79 (m, 2H).

### 2-(2,5-Dihydropyrrole-1-carbonyl)-pyrrolidine-1-carboxylic acid tert-butyl ester (**6**).<sup>8</sup>

<sup>1</sup>H NMR (300 MHz, CD<sub>2</sub>Cl<sub>2</sub>) δ ppm: 5.87-5.69 (m, 2H), 4.54-4.08 (m, 5H), 3.61-3.29 (m, 2H), 2.20-2.04 (m, 2H), 1.92-1.74 (m, 2H), 1.40-1.32 (m, 9H).

### (*E,Z*)-Oxacyclotetradec-11-en-2-one (**8**).<sup>9</sup>

*E* isomer - <sup>1</sup>H NMR (300 MHz, CDCl<sub>3</sub>) δ ppm: 5.51-5.30 (m, 2H), 4.14-4.10 (m, 2H), 2.39-2.33 (m, 4H), 2.04-1.98 (m, 2H), 1.63-1.55 (m, 2H), 1.38-1.27 (m, 10H). <sup>13</sup>C NMR (75.4 MHz, CDCl<sub>3</sub>) δ ppm: 174.1, 132.8, 127.8, 64.3, 35.1, 31.9, 31.3, 26.6, 26.1, 25.8, 25.6, 23.88, 23.80.

### (*E,Z*)-Oxacyclohexadec-11-en-2-one (**10**).<sup>3</sup>

*E* isomer - <sup>1</sup>H NMR (300 MHz, CDCl<sub>3</sub>) δ ppm: 5.40-5.25 (m, 2H), 4.16-4.04 (m, 2H), 2.35-2.25 (m, 2H), 2.06-1.96 (m, 4H), 1.66-1.56 (m, 4H), 1.41-1.20 (m, 12H). <sup>13</sup>C NMR (75.4 MHz, CDCl<sub>3</sub>) δ ppm: 173.9, 131.8, 130.3, 63.9, 34.7, 32.06, 32.02, 28.37, 28.31, 28.2, 28.0, 27.2, 26.5, 25.5, 25.2.

### (*E,Z*)-Dodec-2-enedioic acid dimethyl ester (**15**).<sup>10</sup>

*E* isomer - <sup>1</sup>H NMR (300 MHz, CDCl<sub>3</sub>) δ ppm: 7.01-6.91 (m, 1H), 5.83-5.77 (m, 1H), 3.71 (s, 3H), 3.66 (s, 3H), 2.32-2.27 (m, 2H), 2.21-2.14 (m, 2H), 1.63-1.56 (m, 2H), 1.49-1.39 (m, 2H) 1.28 (s, 8H).

### Hex-2-enedioic acid 1-methyl ester 6-(13-methyl-17-oxo-7,8,9,11,12,13,14,15,16,17-decahydro-6H-cyclopenta[a]phenanthren-3-yl) ester (**17**).<sup>11</sup>

*E* isomer <sup>1</sup>H NMR (300 MHz, CDCl<sub>3</sub>) δ ppm: 7.33-7.27 (m, 1H), 7.01 (dt, *J* = 6.6 Hz, *J* = 15.9 Hz, 1H), 6.86-6.80 (m, 2H), 5.93 (dt, *J* = 1.5 Hz, *J* = 15.9 Hz, 1H), 3.74 (s, 3H), 2.92-2.88 (m, 2H), 2.74-2.60 (m, 4H), 2.55-2.37 (m, 2H), 2.33-2.25 (m, 20 H), 2.20-1.94 (m, 4H), 1.67-1.42 (m, 6H), 0.90 (s, 3H).

### (*E/Z*)-Methyl 12-acetoxydodec-10-enoate (**19**).<sup>12</sup>

<sup>1</sup>H NMR (300 MHz, CDCl<sub>3</sub>) δ ppm: 5.80-5.75 (m, 1H), 5.59-5.52 (m, 1H), 4.55 (d, *J* = 6.7 Hz, 2H), 4.52 (d, *J* = 6.4 Hz, 2H), 3.68 (s, 3H), 2.33 (t, *J* = 7.5 Hz, 2H), 2.07 (s, 3H), 1.64-1.62 (m, 2H), 1.40-1.30 (m, 12H).

## Copies of the NMR and IR spectra

### Catalyst E-II'

#### <sup>1</sup>H NMR

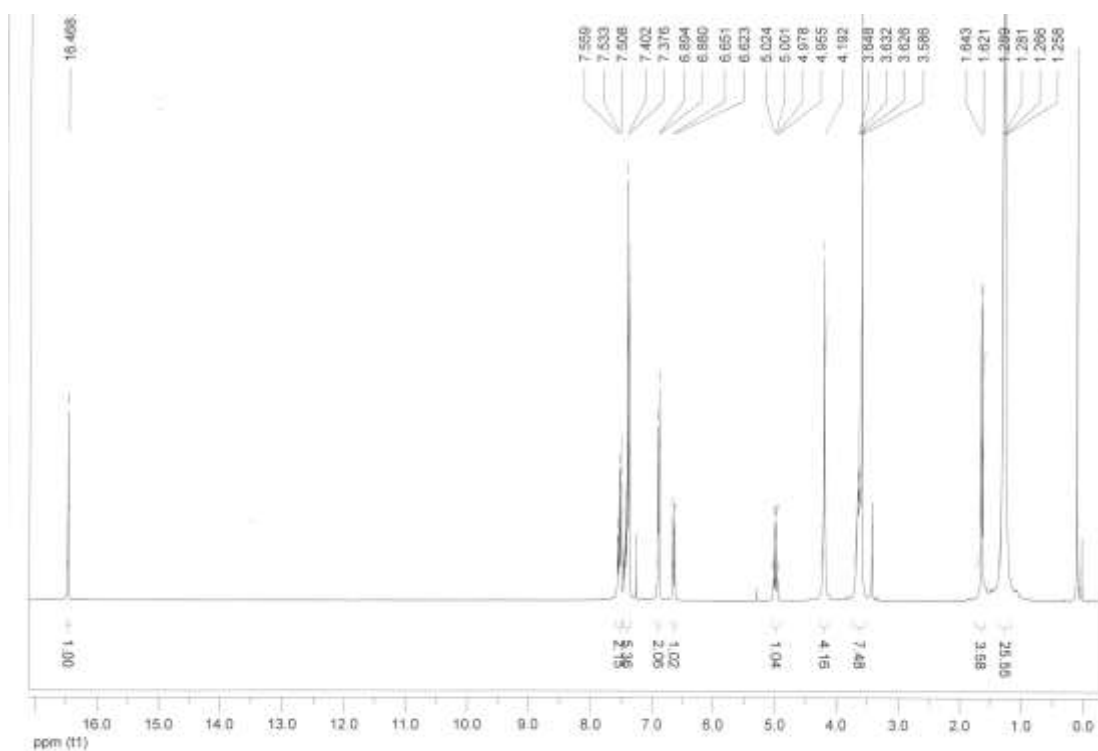

#### <sup>13</sup>C NMR

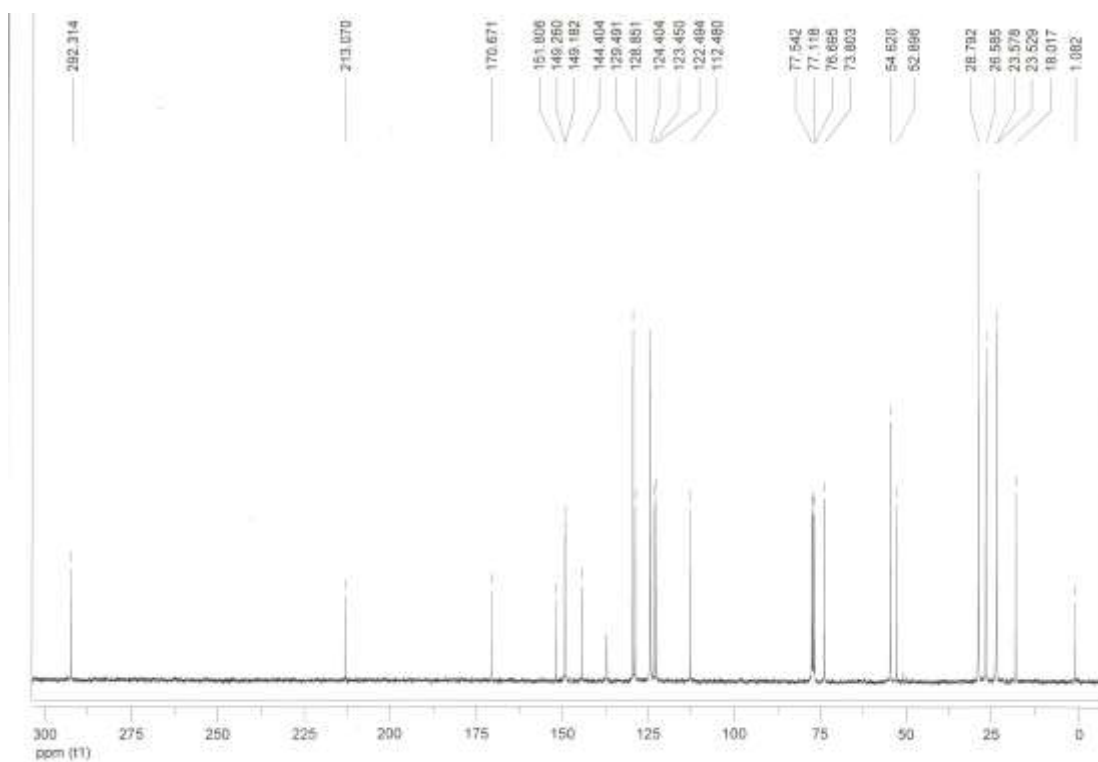

IR

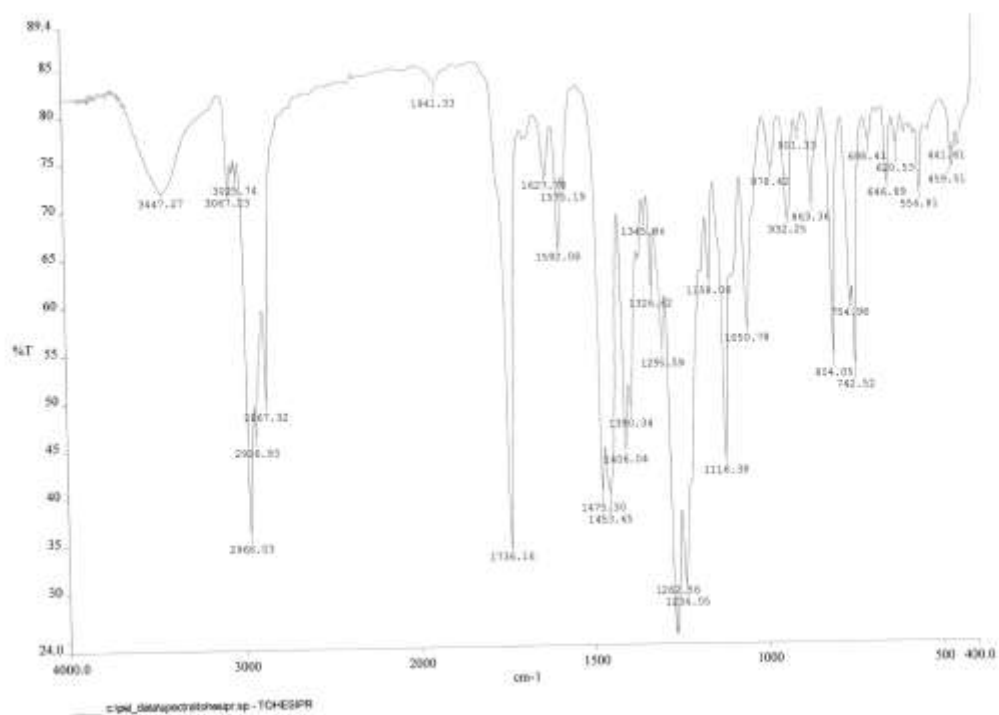

*N*-Tosyl-2,5-dihydropyrrole (**2**)

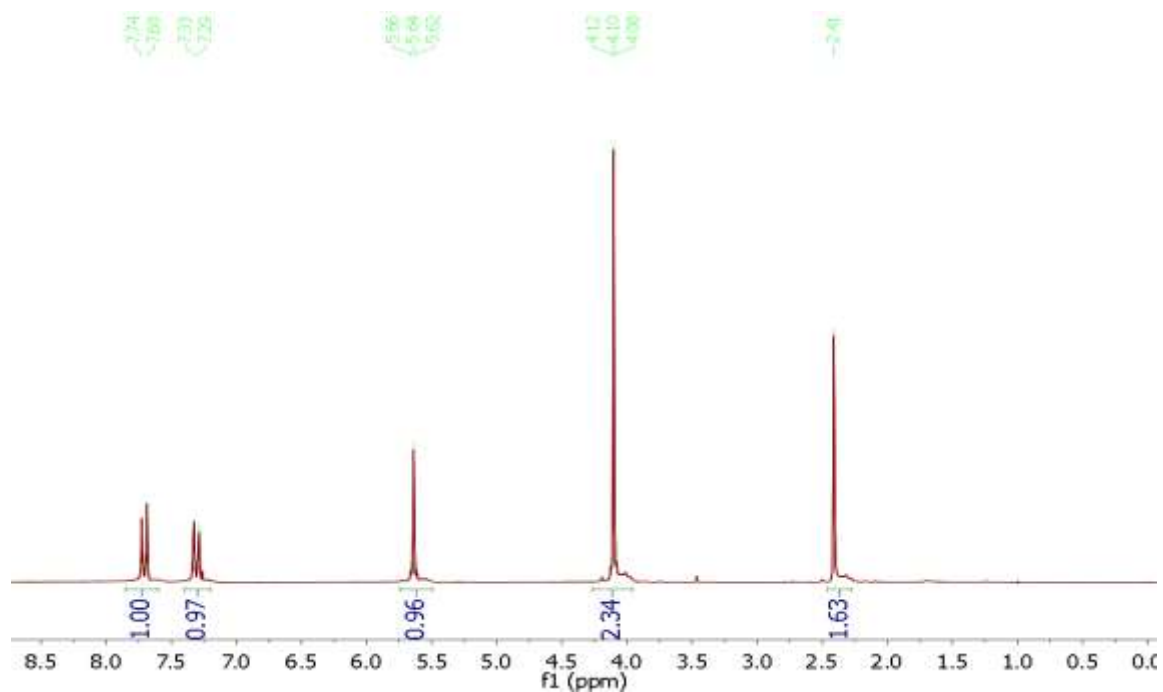

*1-Tosyl-2,3-dihydro-1H-pyrrole (2')*

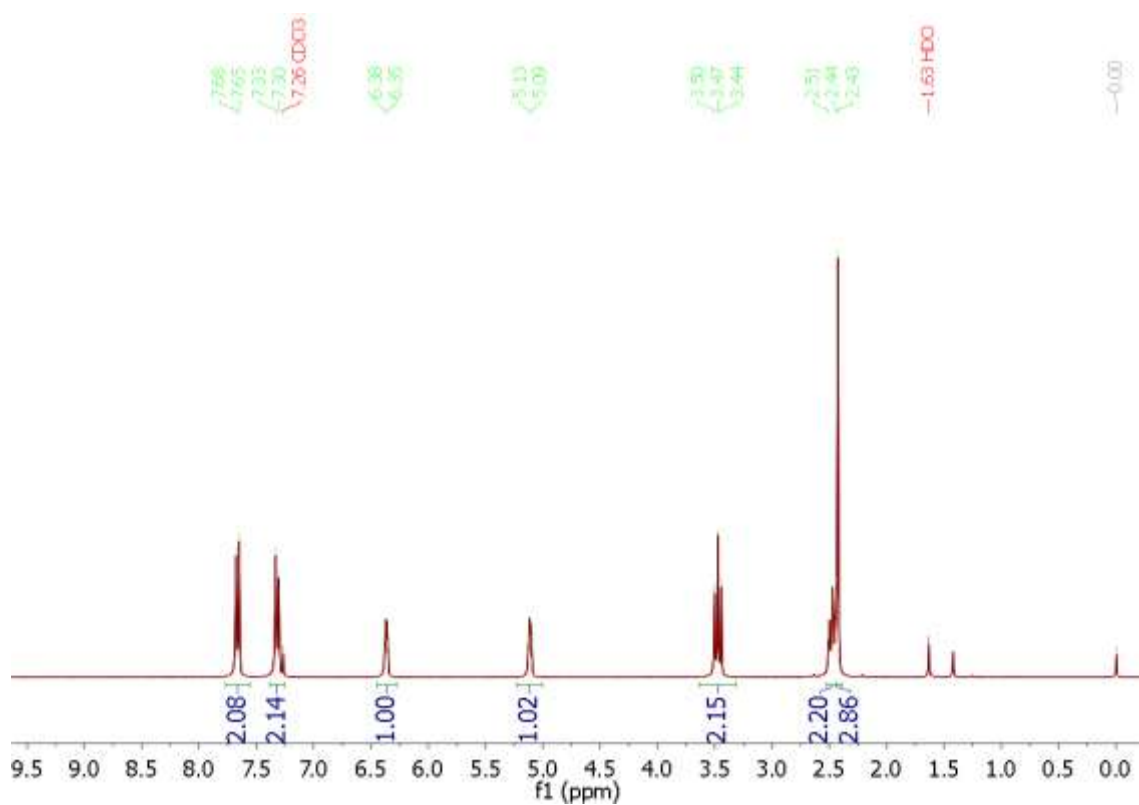

*3-Methyl-4-methylene-1-[(4-methylphenyl)sulfonyl]pyrrolidin (2'')*

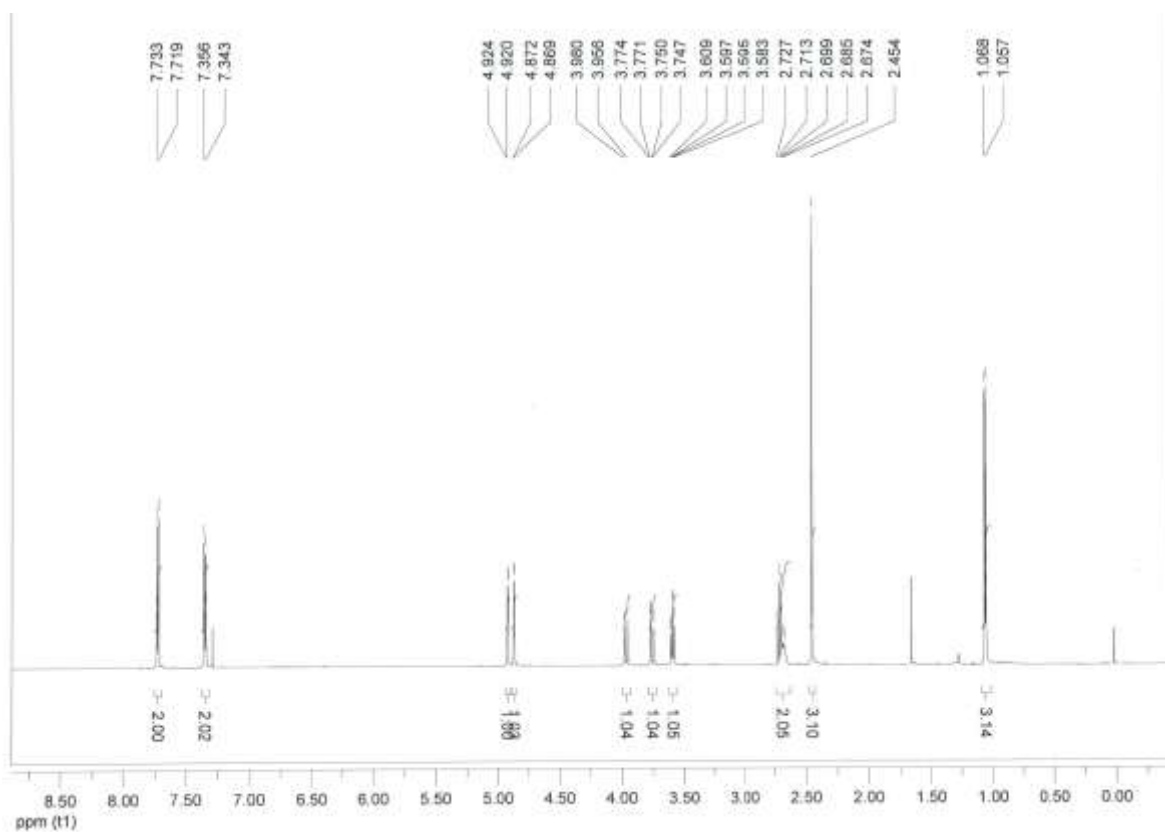

*N*-Tosyl-3-methyl-2,5-dihydropyrrole (**4**)

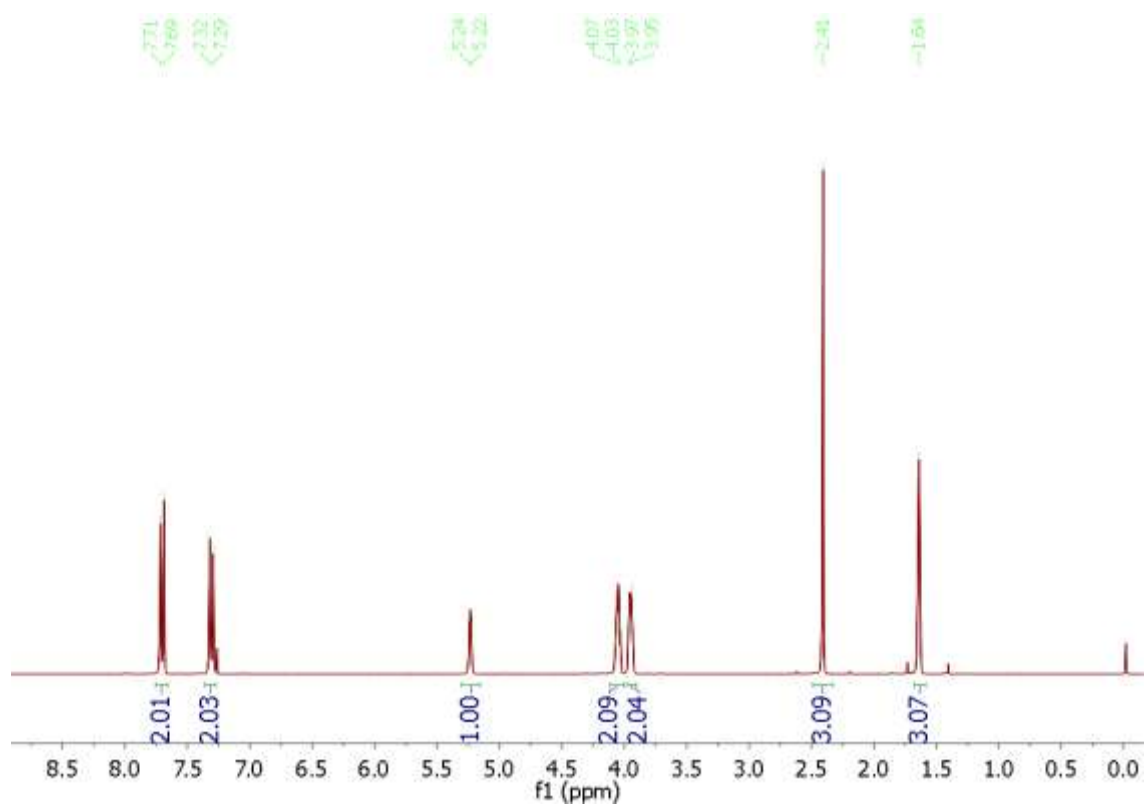

2,2-Diphenyl-3-vinyl-2,5-dihydrofuran (**12**)

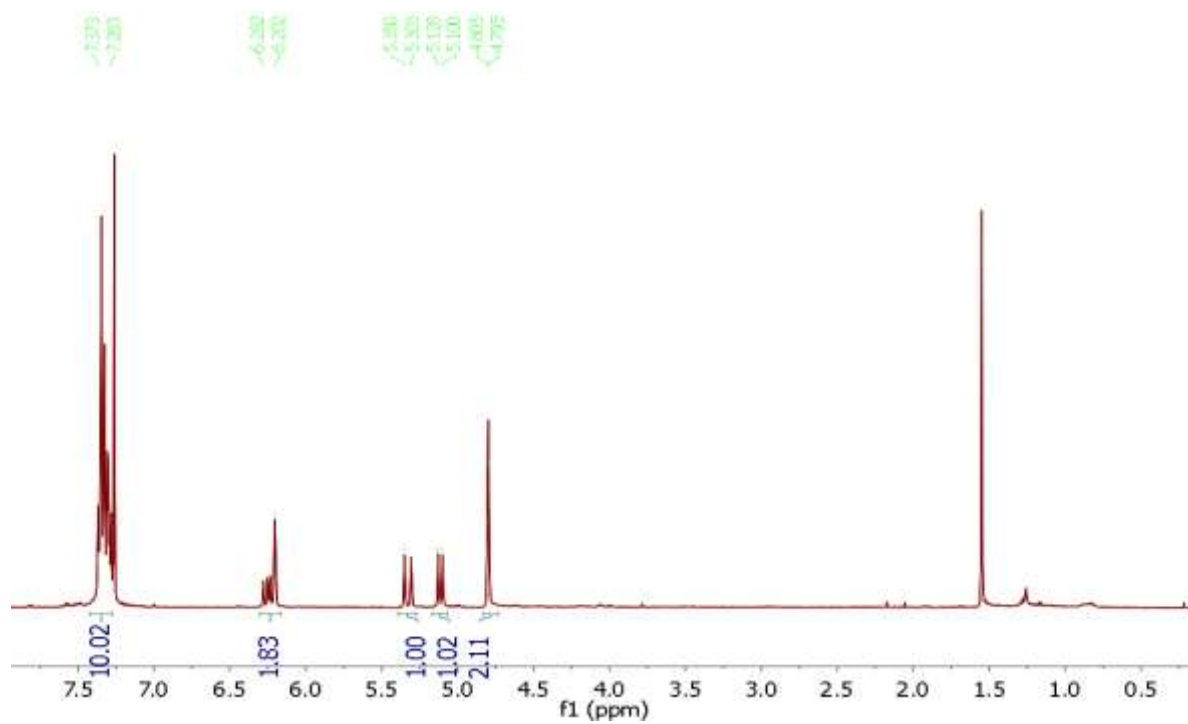

2-(2,5-Dihydropyrrole-1-carbonyl)-pyrrolidine-1-carboxylic acid tert-butyl ester (**6**)

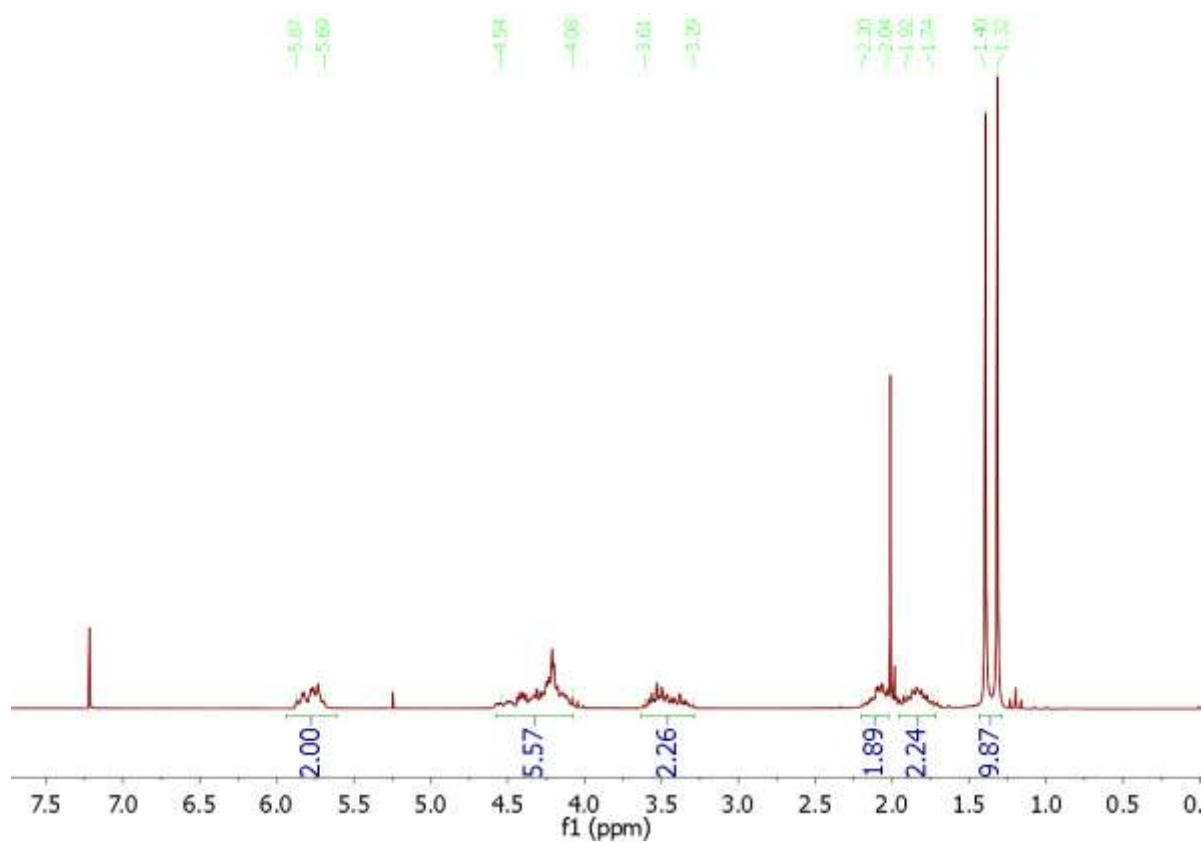

(*E,Z*)-Oxacyclotetradec-11-en-2-one (**8**)

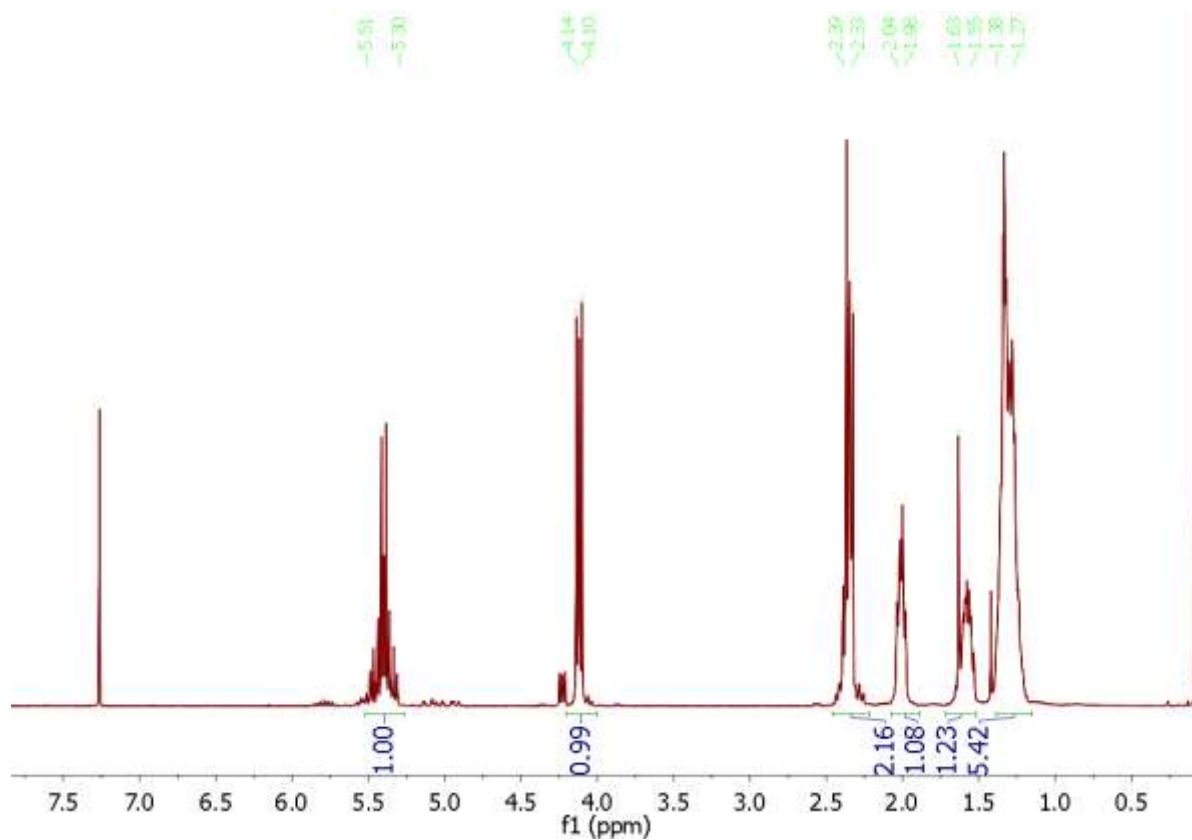



(*E,Z*)-Oxacyclohexadec-11-en-2-one (**10**)

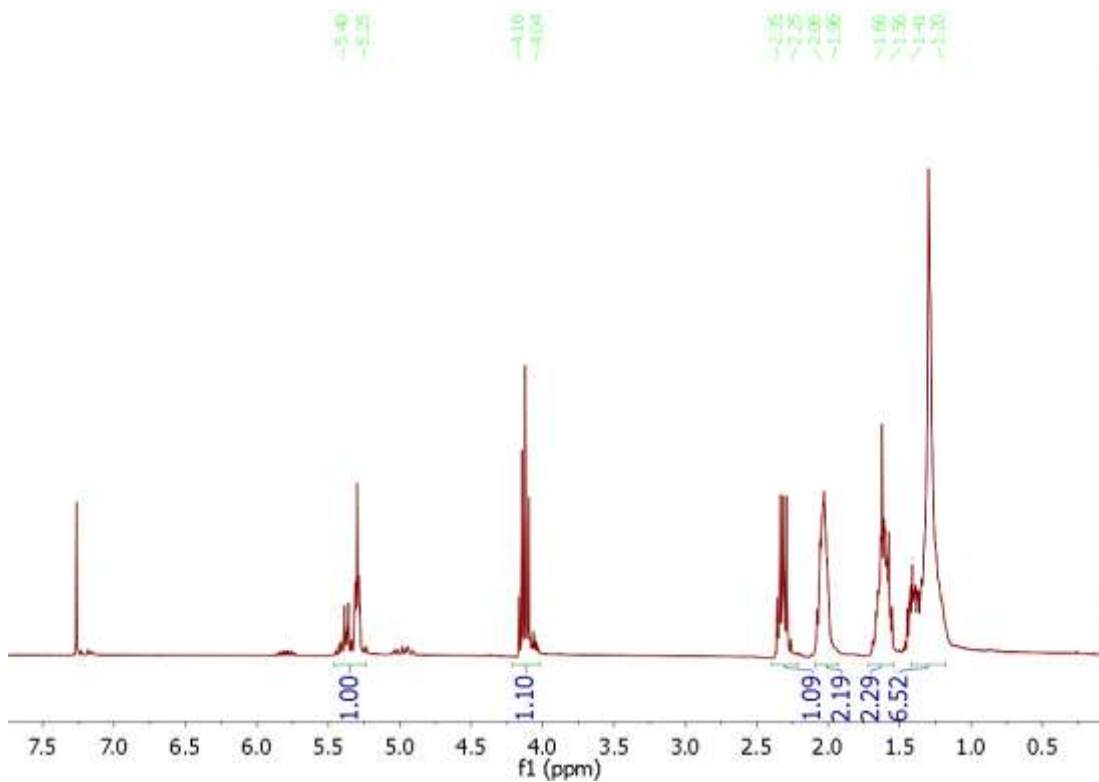

(*E,Z*)-Dodec-2-enedioic acid dimethyl ester (**15**)

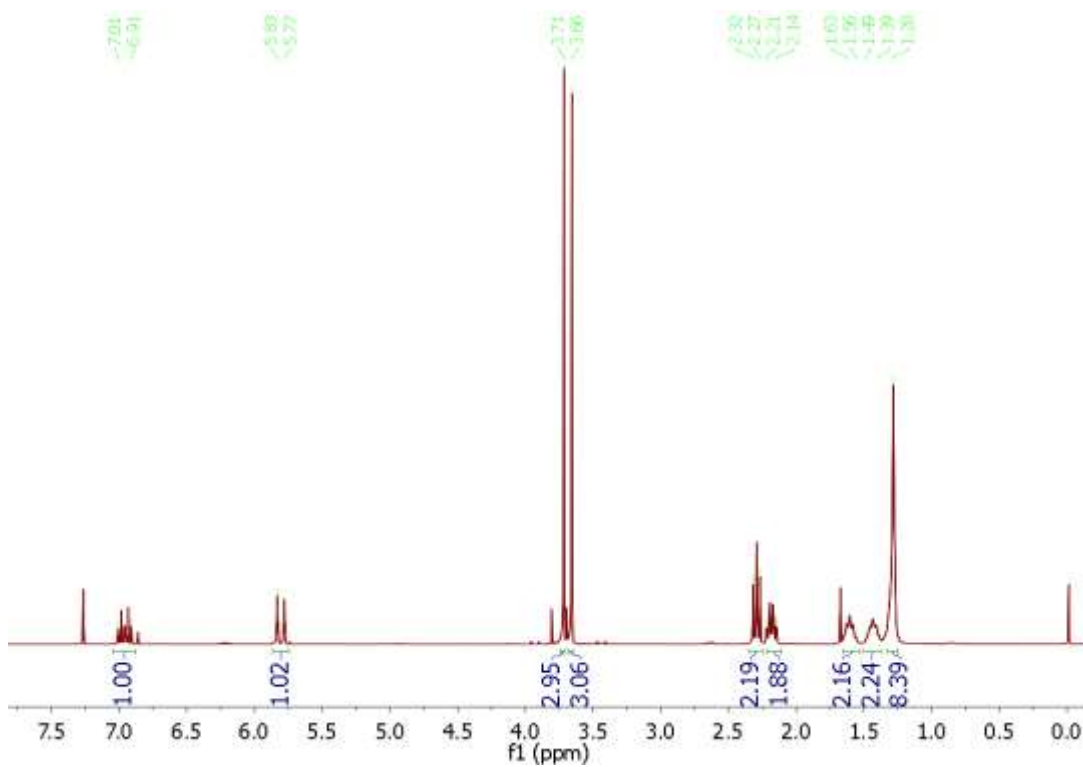

Hex-2-enedioic acid 1-methyl ester 6-(13-methyl-17-oxo-7,8,9,11,12,13,14,15,16,17-decahydro-6H-cyclopenta[a]phenanthren-3-yl) ester (**17**)

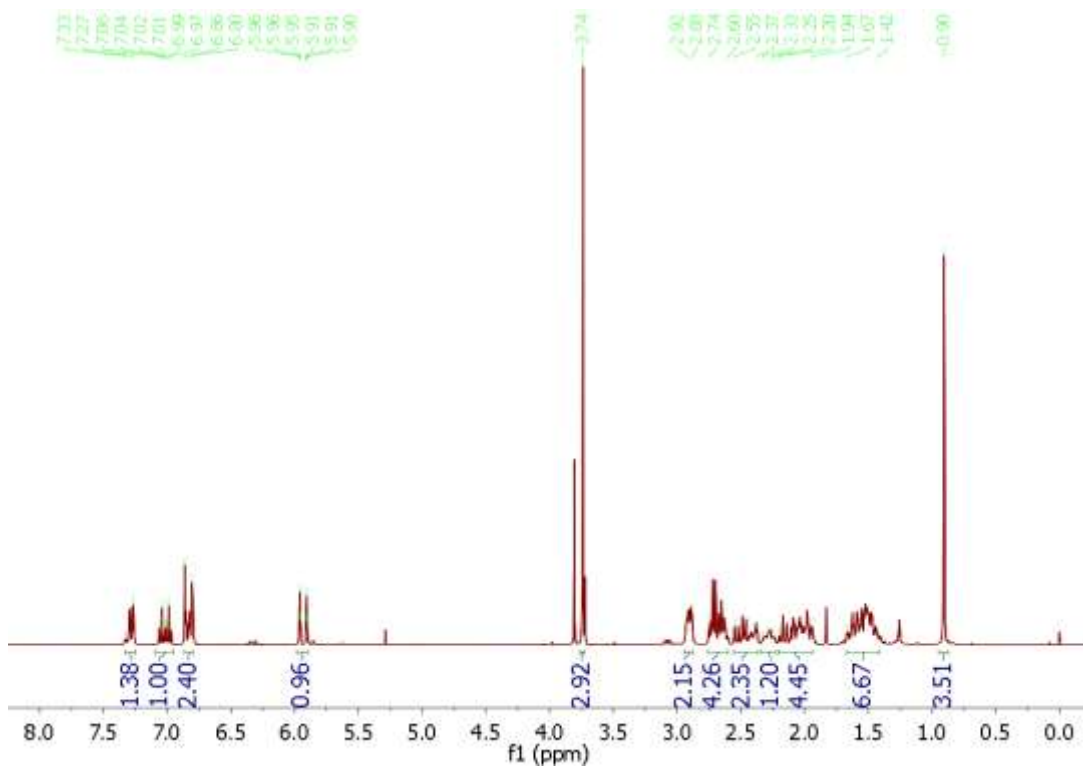

Methyl 12-acetoxydodec-10-enoate (**19**)

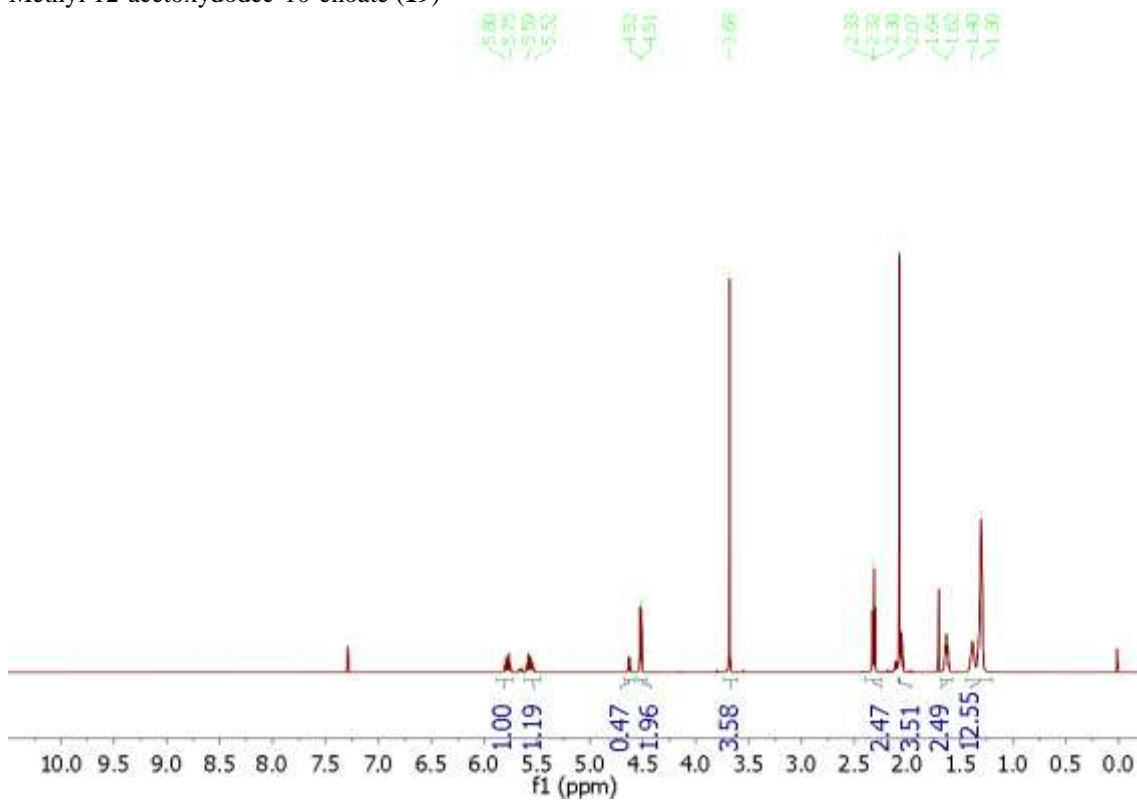

## References

- [1] F. C. Courchay, J. C. Sworen, A. Coronado, K. B. Wagener *Journal of Molecular Catalysis A: Chemical* **2006**, 254, 111–117.
- [2] Bieniek, M.; Bujok, R.; Cabaj, M.; Lugan, N.; Lavigne, G.; Arlt, D.; Grela, K. *J. Am. Chem. Soc.* **2006**, 128, 13652–13653.
- [3] A. Furstner, M. Liebl, C. W. Lehmann, M. Piquet, R. Kunz, C. Bruneau, D. Touchard, P. H. Dixneuf, *Chem. Eur. J.* **2000**, 6, 1847–1857.
- [4] M. Shao, L. Zheng, W. Qiao, J. Wang, and J. Wang *Adv. Synth. Catal.* **2012**, 354, 2743 – 2750.
- [5] A. Mallagaray, K. Mohammadiannejad-Abbasabadi, S. Medina, G. Domínguez J. Pérez-Castells *Org. Biomol. Chem.*, **2012**, 10, 6665–6672.
- [6] Q. Wu, J. H. X. Ren, J. Zhou, *Chem. Eur. J.* **2011**, 17, 11553–11558.
- [7] A. Furstner, L. Ackermann, B. Gabor, R. Goddard, C. W. Lehmann, R. Mynott, F. Stelzer, O. R. Thiel, *Chem. Eur. J.* **2001**, 7, 3236–3253.
- [8] J. Cabrera, R. Padilla, R. Dehn, S. Deuerlein, Ł. Gułajski, E. Chomiszczak, J. H. Teles, M. Limbach, K. Grela *Adv. Synth. Catal.* **2012**, 354, 1043–1051.
- [9] V. M. Marx, M. B. Herbert, B. K. Keitz, R. H. Grubbs *J. Am. Chem. Soc.* **2013**, 135, 94–97.
- [10] X. Miao, C. Fischmeister, P. H. Dixneuf, C. Bruneau, J.-L. Dubois, J.-L. Couturier *Green Chem.*, **2012**, 14, 2179–2183.
- [11] K. Skowerski, C. Wierzbicka, G. Szczepaniak, Ł. Gułajski, M. Bieniek, K. Grela *Green Chem.*, **2012**, 14, 3264–3268.
- [12] M. von Czapiewski, O. Kreye, H. Mutlu, M. A. R. Meier *Eur. J. Lipid Sci. Technol.* **2013**, 115, 76–85.
